# Supplementary material for: Gaps and Fiscal Adjustment for Debt Stability in Climate-Vulnerable Developing Countries: How Large and by How Much?
Source: publisher site journal article supplement (doi:10.1515/jgd-2023-0075), 2024-11-11
Supplement: Supplementary file 1 [file j_jgd-2023-0075_suppl_001.docx]

**Gaps and Fiscal Adjustment for Debt Stability in Climate-Vulnerable Developing Countries:**

**How large and by how much?**

**Supplementary Material**

**Supplement A: Variable definitions and Data sources**

*All data are based on information compiled as of 2 February 2022.*

1. **Short-Term Gap**

Source: Blanchard et al. (1990), p. 17

Primary deficit, d

Growth adjusted interest rate, *r- θ*

b0, lagged debt (i.e., debt at the end of year 0 or beginning of year 1)

| **Variable** | **Source** | **Units** |
| --- | --- | --- |
| Total Expense a | IMF Government Finance Statistics Database c | National Currency |
| Interest Payment a, b |
| Tax Revenues a |
| Nominal GDP | IMF World Economic Outlook Database | National Currency, Billions |
| Debt d | National Currency, Billions |
| GDP Deflator | Index |
| Real GDP | National Currency, Billions |

Notes: a Budgetary Central Government; b “Interest expense” in the database. Treasury-bill rates were also considered for *i*. However, they were only available for 28 countries and 8 years on average. c When not available from this source, we refer to IMF Staff Reports containing Debt Sustainability Analysis, including *Article IV, Review Under the Extended Credit Facility Arrangement*, *Review Under the Stand-by Arrangement,* *Review Under the Staff-Monitored Program, Request for Disbursement Under the Rapid Credit Facility, Request for Purchase Under the Rapid Financing Instrument, Request for Arrangement Under the Extended Credit Facility.* d General government gross debt

Example: When computing for a country’s 2019 short-term gap, we use fiscal data, interest rate, and GDP growth rate for 2019 together with debt data for beginning 2019 (i.e., end-2018).

1. **Medium-Term Gap (s = 1, 2, …5)**

Source: Note 7, Blanchard et al. (1990), pp. 17 and 35

r - θ, Average Forecast Growth-Adjusted Interest Rate (as of year 0)

rs. Forecast Real Effective Interest Rate

θs, Forecast Real GDP Growth

For 2021, r – θ “stressed”:

is the country-specific mean interest rate for 2021 to 2025

is the country-specific standard deviation of interest rate for 2021 to 2025

is the country-specific mean GDP growth rate for 2021 to 2025

is the country-specific standard deviation of GDP growth rate for 2021 to 2025

gs + hs, Forecast Non-Interest Spending Ratio in year s (as of year 0)

b0, lagged debt (i.e., debt at the end of year 0 or beginning of year 1)

t1, Forecast Tax Revenue Ratio in year 1 (as of year 0)

| **Variable** | **Source** | **Units** |
| --- | --- | --- |
| Forecast Effective Interest Rate | IMF Staff Reports containing Debt Sustainability Analysis a | Percent |
| Forecast Inflation (GDP Deflator) | Percent |
| Forecast Real GDP Growth | Percent |
| Forecast Total Expense | National Currency, Billions |
| Forecast Interest Expense | National Currency, Billions |
| Forecast Nominal GDP | National Currency, Billions |
| Forecast Tax Revenues | National Currency, Billions |
| Debt b | IMF World Economic Outlook Database | National Currency, Billions |
| Nominal GDP | National Currency, Billions |

Notes: a Includes *Article IV, Review Under the Extended Credit Facility Arrangement, Review Under the Stand-by Arrangement, Review Under the Staff-Monitored Program, Request for Disbursement Under the Rapid Credit Facility, Request for Purchase Under the Rapid Financing Instrument, Request for Arrangement Under the Extended Credit Facility**;* b General government gross debt

Example: When computing for a country’s 2020 medium-term gap, we use fiscal data, interest rates, and GDP growth rates for 2020 to 2024, together with debt data for beginning 2020 (i.e., end-2019).

Four countries have no 5-year forecasts for any year and therefore have no estimated MTGs. Seven countries do not have a complete 5-year forecast for years 2021-2025 as of 2020, and therefore have no MTG for 2021.

1. **Climate Change Gaps (s = 1, 2, … 10)**

r - θ, Average Forecast Growth-Adjusted Interest Rate (as of year 0)

Where n is the length of the available forecast

rs, Forecast Real Effective Interest Rate

θs, Forecast Real GDP Growth

r – θ “stressed”:

is the country-specific mean interest rate for 2021 to 2025

is the country-specific standard deviation of interest rate for 2021 to 2025

is the country-specific mean GDP growth rate for 2021 to 2025

is the country-specific standard deviation of GDP growth rate for 2021 to 2025

gs + hs, Forecast Non-Interest Spending Ratio (as of year 0)

For 2021 - 2026:

Note: When the forecast is not available, the value is replaced by the average of the available years.

For 2025, reported climate change costed needs is added

For 2027 – 2030:

Where n is the length of the available forecast

b0, lagged debt (i.e., debt at end of year 0 or beginning of year 1)

t1, Forecast Tax Revenue Ratio in year 1 (as of year 0)

| **Variable** | **Source** | **Units** |
| --- | --- | --- |
| Forecast Effective Interest Rate | IMF Staff Reports containing Debt Sustainability Analysis a, b | Percent |
| Forecast Inflation (GDP Deflator) | Percent |
| Forecast Real GDP Growth | Percent |
| Forecast Total Expense | National Currency, Billions |
| Forecast Interest Expense | National Currency, Billions |
| Forecast Nominal GDP | National Currency, Billions |
| Forecast Tax Revenues | National Currency, Billions |
| Stated Needs for Climate Change | UNFCCC (2021) | USD, Billions |
| Forecast Nominal GDP in USD (GDP, current prices) | IMF World Economic Outlook Database | USD, Billions |
| Debt c | National Currency, Billions |
| Nominal GDP | National Currency, Billions |

Notes: a Includes *Article IV, Review Under the Extended Credit Facility Arrangement, Review Under the Stand-by Arrangement, Review Under the Staff-Monitored Program, Request for Disbursement Under the Rapid Credit Facility, Request for Purchase Under the Rapid Financing Instrument, Request for Arrangement Under the Extended Credit Facility.* b Five countries did not have complete data on interest rate, inflation and GDP for 2021 to 2025 and so a shorter series was used to compute r – θ: 2021 to 2023 for Bhutan and Kiribati, and 2021 to 2024 data for Haiti, Lebanon, and Sri Lanka.

C General government gross debt

Although not all countries in the sample have an estimated MTG for 2021, all countries will have a Climate Change gap because a 5-year forecast for 2021-2025 is not required.

**Supplement B.1 National Reports, Costed Needs and Estimated Costs**

| Country | Region | Selected National Report a | Number of expressed needs | Number of costed needs | Costed Need (high range), USD Billions | Ave Annual Costed Needs (% of GDP) b | Note: Ave. Annual Losses from extreme weather events, US$ M (PPP) c | Note: Ave. Annual Losses from extreme weather per unit of GDP in % c |
| --- | --- | --- | --- | --- | --- | --- | --- | --- |
| Afghanistan | AP | NC | 16 | 16 | 11.4 | 4.8 | 100.8 | 0.218 |
| Bangladesh | AP | NC | 30 | 25 | 79.7 | 1.5 | 2,403.8 | 0.640 |
| Barbados | LAC | NC | 56 | -- | -- | -- | 4.0 | 0.092 |
| Bhutan | AP | NC | 69 | 14 | 0.9 | 2.5 | 5.0 | 0.133 |
| Burkina Faso | AME | NDC | 60 | 60 | 7.8 | 2.7 | 40.2 | 0.193 |
| Cambodia | AP | NDC | 96 | 79 | 4.2 | 1.2 | 242.5 | 0.723 |
| Colombia | LAC | NDC | 32 | 1 | 0.1 | 0.0 | 628.9 | 0.128 |
| Comoros | AME | NDC | 26 | 1 | 0.7 | 4.0 | 0.7 | 0.066 |
| Costa Rica | LAC | BUR | 34 | 2 | 3.4 | 0.4 | 66.3 | 0.117 |
| DR of the Congo | AME | NDC | 5 | 4 | 12.5 | 1.6 | 5.9 | 0.015 |
| Dominican Republic | LAC | NDC | 41 | 41 | 17.6 | 1.4 | 268.8 | 0.269 |
| Ethiopia | AME | NDC | 5 | 5 | 294.7 | 22.0 | 240.2 | 0.242 |
| Fiji | AP | LEDS | 152 | 86 | 57.3 | 89.0 | 120.0 | 1.896 |
| Gambia | AME | NAPA | 10 | 10 | 0.2 | 0.5 | 7.2 | 0.198 |
| Ghana | AME | NDC | 27 | 27 | 22.6 | 2.2 | 32.4 | 0.044 |
| Grenada | LAC | NDC | 9 | 9 | 1.1 | 7.5 | 78.6 | 7.104 |
| Guatemala | LAC | NC | 39 | -- | -- | -- | 394.5 | 0.408 |
| Haiti | LAC | NDC | 17 | 17 | 25.4 | 11.8 | 418.2 | 2.642 |
| Honduras | LAC | TAPs | 58 | 58 | 0.1 | 0.0 | 556.6 | 1.846 |
| Kenya | AME | NDC | 19 | 11 | 61.7 | 4.2 | 346.6 | 0.329 |
| Kiribati | AP | NDC | 12 | 12 | 0.1 | 2.6 | 10.5 | 6.183 |
| Lebanon | AME | TAP | 64 | 27 | 0.0 | 0.0 | 27.0 | 0.046 |
| Madagascar | AME | NDC | 20 | 4 | 42.1 | 21.1 | 221.3 | 0.794 |
| Malawi | AME | NC | 124 | 3 | 0.0 | 0.0 | 64.9 | 0.494 |
| Maldives | AP | NAPA | 12 | 12 | 0.1 | 0.2 | 0.5 | 0.013 |
| Marshall Islands | AP | NDC | 26 | -- | -- | -- | 0.0 | 0.027 |
| Mongolia | AP | NDC | 14 | 14 | 11.5 | 5.6 | 82.3 | 0.307 |
| Morocco | AME | NDC | 99 | 68 | 90.5 | 5.7 | 174.0 | 0.093 |
| Nepal | AP | NDC | 81 | 53 | 25.0 | 5.4 | 230.8 | 0.438 |
| Niger | AME | NDC | 23 | 23 | 8.7 | 3.5 | 48.4 | 0.369 |
| Palau | AP | NC | 17 | 8 | 0.3 | 8.2 | *-* | *-* |
| Papua New Guinea | AP | NDC | 142 | 41 | 1.6 | 0.5 | 15.1 | 0.076 |
| Philippines | AP | NC | 45 | 2 | 3.0 | 0.1 | 2,932.2 | 0.576 |
| Rwanda | AME | NDC | 54 | 54 | 10.6 | 7.5 | 3.7 | 0.029 |
| Saint Lucia | LAC | NC | 119 | 39 | 0.9 | 3.8 | 17.7 | 0.940 |
| Samoa | AP | NAPA | 33 | 33 | 1.5 | 15.9 | 8.5 | 0.952 |
| Senegal | AME | NDC | 32 | 32 | 13.1 | 3.2 | 15.3 | 0.046 |
| South Sudan | AME | NDC | 46 | 46 | 50.0 | 77.0 | 20.5 | 0.059 |
| Sri Lanka | AP | TNA | 9 | 6 | 9.6 | 0.9 | 491.0 | 0.294 |
| State of Palestine | AME | NDC | 108 | 82 | 14.1 | 6.5 | *-* | *-* |
| Sudan | AME | NDC | 15 | 12 | 14.4 | 3.0 | 95.5 | 0.057 |
| Timor-Leste | AP | NC | 30 | 3 | 0.2 | 1.1 | 0.3 | 0.004 |
| Tunisia | AME | NDC | 13 | 13 | 19.9 | 3.7 | 66.0 | 0.071 |
| Tuvalu | AP | NAPA | 9 | 10 | 0.0 | 0.9 | 2.6 | 8.294 |
| U.R. of Tanzania | AME | NDC | 54 | 54 | 65.0 | 6.9 | 52.7 | 0.060 |
| Vanuatu | AP | NC | 33 | 33 | 1.3 | 10.2 | 15.7 | 2.807 |
| Viet Nam | AP | NC | 14 | 8 | 47.4 | 0.8 | 2,064.7 | 0.516 |
| Yemen | AME | NDC | 34 | 8 | 1.2 | 0.5 | 110.1 | 0.112 |

Source: UNFCCC [2021], Annex C. Notes: a Country report that indicates the largest amount of associated costs, which may be either a Biennial Update Report (BUR), Low-Emission Development Strategies (LEDS), National Adaptation Programme of Action (NAPA), National Communication (NC), Nationally Determined Contribution (NDC), Technology Action Plan (TAP), or Technology Needs Assessment (TNA).; b Authors’ estimates; c From Global Climate Risk Index 2019, covering the period 1998-2017 [Germanwatch 2018]

**Supplement B.2 Cost Reporting of Countries with Positive CCGs and Negative CCGs**

| Sub-sample | Number of Needs | | Number of quantified needs | | % of needs costed | Costed Need (high range), USD Billions | | Ave Annual Costed Needs (% of GDP) | |
| --- | --- | --- | --- | --- | --- | --- | --- | --- | --- |
|  | mean | sd | mean | sd |  | mean | Sd | mean | Sd |
| Positive CCGs (30 countries) | 44.6 | 39.8 | 25.6 | 23.1 | 57 | 66.5 | 38.7 | 28.7 | 47.5 |
| Largest 15 (positive) | 35.6 | 36.5 | 22.8 | 22.5 | 64 | 70.8 | 39.2 | 14.2 | 20.7 |
| Negative CCGs (15 countries) | 39.8 | 36.3 | 24.8 | 23.8 | 62 | 77.6 | 32.7 | 14.2 | 18.8 |

Base data: Supplement B.1

**Supplement B.3 Correlation Matrix of Needs and Costed Needs [UNFCCC 2021] and Average Annual Losses from Extreme Weather Events [Germanwatch 2018]**

|  | Ave annual absolute losses from extreme weather events, in US M PPP | Ave annual losses from extreme weather events per unit of GDP in % |
| --- | --- | --- |
| Number of needs | -0.09 | -0.16 |
| Number of quantified needs | -0.16 | -0.08 |
| Costed Need (high range), USD Billions | 0.13 | -0.13 |
| Ave Annual Costed Needs (% of GDP) | -0.12 | 0.03 |

Base data: Supplement B.1

**Supplement C. Components of Indices of Sustainability**

| Country | Non-Interest Spending to GDP Ratio | | | | | Tax Revenue to GDP Ratio | | | Growth-Adjusted Interest Rate | | | | | | General Government Gross Debt to GDP Ratio | | |
| --- | --- | --- | --- | --- | --- | --- | --- | --- | --- | --- | --- | --- | --- | --- | --- | --- | --- |
|  | g+h | g+h | g+h | mean g+h | mean g+h | t | T | t | r-θ | r-θ | r-θ | mean r-θ | mean r-θ | mean, stressed r-θ | b0 | b0 | b0 |
|  | 2010 | 2019 | 2020 | 2021-25 | 2021-26 | 2010 | 2019 | 2020 | 2010 | 2019 | 2020 | 2021-25 | 2021-26 | 2021-2025 | 2010 | 2019 | 2020 |
| Afghanistan | 17.7 | 19.6 | 18.4 | 17.9 | 17.7 | 9.3 | 8.3 | 7.4 | -16.5 | -9.6 | -4.8 | -7.8 | -7.8 | -6.7 | 7.7 | 6.1 | 7.4 |
| Bangladesh | 7.4 | 7.6 | 7.3 | 12.3 | 12.3 | 7.8 | 10.3 | 10.1 | -7.4 | -6.2 | -1.2 | -10.5 | -10.5 | -9.1 | 35.5 | 35.7 | 38.9 |
| Barbados | 29.0 | 24.2 | 31.6 | 25.6 | 25.3 | 24.7 | 28.3 | 28.6 | 3.9 | -2.2 | 19.0 | -3.8 | -3.1 | 1.2 | 108.9 | 119.6 | 150.4 |
| Bhutan | 21.4 | 17.6 | 24.1 | 14.4 | 14.4 | 14.6 | 16.2 | 12.5 | -10.1 | -4.7 | -2.8 | -7.2 | -7.2 | -5.3 | 61.0 | 106.6 | 120.7 |
| Burkina Faso | 10.2 | 17.0 | 16.1 | 15.3 | 15.3 | 11.3 | 15.7 | 13.7 | -10.4 | -1.7 | -3.0 | -6.1 | -6.1 | -5.3 | 27.8 | 42.0 | 46.5 |
| Cambodia | 10.4 | 15.4 | 18.4 | 18.6 | 18.5 | 10.0 | 19.7 | 18.3 | -8.2 | -9.0 | 7.2 | -7.5 | -7.8 | -5.8 | 28.7 | 28.6 | 34.2 |
| Colombia | 15.1 | 18.4 | 20.2 | 17.3 | 17.0 | 11.3 | 14.9 | 13.0 | 0.3 | -0.8 | 10.4 | -1.4 | -1.4 | -0.6 | 36.5 | 52.3 | 65.4 |
| Comoros | 13.9 | 18.2 | 20.5 | 18.6 | 18.6 | 6.7 | 7.0 | 8.2 | -4.0 | -5.3 | 0.7 | -4.4 | -4.4 | -4.2 | 30.5 | 19.5 | 22.3 |
| Costa Rica | 16.5 | 17.2 | 18.1 | 15.1 | 14.7 | 12.6 | 13.0 | 12.1 | -3.2 | 3.7 | 11.9 | 2.8 | 2.5 | 4.1 | 28.1 | 56.7 | 67.5 |
| DR of the Congo | 8.1 | 9.8 | 9.8 | 14.5 | 14.7 | 8.4 | 7.0 | 6.2 | -27.5 | -8.0 | -6.7 | -12.5 | -12.2 | -6.9 | 30.6 | 15.0 | 15.2 |
| Dominican Republic | 11.2 | 12.6 | 18.9 | 13.9 | 13.9 | 12.2 | 13.3 | 12.4 | -8.2 | -1.7 | 7.9 | -1.5 | -1.5 | -1.0 | 37.3 | 53.5 | 71.5 |
| Ethiopia | 12.1 | 9.2 | 9.4 | 8.6 | 8.6 | 8.2 | 6.7 | 9.2 | -12.6 | -20.2 | -23.2 | -16.9 | -16.9 | -10.2 | 39.6 | 57.9 | 55.4 |
| Fiji | 18.7 | 24.0 | 29.5 | 27.4 | 26.9 | 20.1 | 22.7 | 16.7 | -0.2 | 4.3 | 24.5 | -1.7 | -1.6 | 4.0 | 51.8 | 48.9 | 70.8 |
| Gambia | 7.1 |  | 14.5 | 11.2 | 11.0 | 8.4 |  | 10.8 | -6.1 |  | -1.9 | -9.9 | -9.8 | -8.9 | 42.9 | 83.0 | 83.5 |
| Ghana | 12.6 | 12.0 | 19.1 | 13.8 | 13.8 | 9.9 | 12.0 | 12.0 | -13.2 | -4.7 | 3.5 | -6.9 | -6.9 | -4.4 | 34.5 | 62.6 | 78.9 |
| Grenada | 17.6 | 17.3 | 24.2 | 17.6 | 17.6 | 18.7 | 22.5 | 21.9 | 2.3 | 1.6 | 17.0 | -4.7 | -4.7 | -2.9 | 96.9 | 60.5 | 71.3 |
| Guatemala | 11.2 | 11.4 | 13.2 | 10.9 | 10.9 | 10.4 | 10.5 | 10.0 | -0.9 | -1.0 | 5.4 | -0.5 | -0.5 | 0.4 | 24.0 | 26.5 | 31.5 |
| Haiti | 14.7 | 9.2 | 9.1 | 16.7 | 16.7 | 5.3 | 5.9 | 5.7 | 0.2 | -14.1 | -16.3 | -12.7 | -12.7 | -10.0 | 23.2 | 25.8 | 21.3 |
| Honduras | 19.2 | 15.4 | 18.4 | 17.3 | 17.2 | 14.4 | 17.5 | 14.8 | -4.5 | 0.8 | 11.4 | -4.0 | -3.9 | -3.1 | 22.6 | 43.3 | 51.3 |
| Kenya | 14.3 | 18.0 | 19.1 | 13.7 | 13.7 | 13.9 | 15.1 | 14.2 | -5.0 | -2.6 | 2.4 | -8.8 | -8.8 | -8.4 | 39.1 | 59.0 | 67.6 |
| Kiribati |  | 85.2 | 72.7 | 64.2 | 64.2 |  | 22.7 | 22.3 |  | -1.8 | -1.1 | -1.9 | -1.9 | -1.4 | 8.2 | 18.0 | 17.4 |
| Lebanon | 15.7 | 19.0 | 15.2 | 22.3 | 22.3 | 16.8 | 15.3 | 10.9 | -0.9 | 9.1 | -31.1 | 3.3 | 3.3 | 3.9 | 136.8 | 171.1 | 150.4 |
| Madagascar | 7.9 | 9.4 | 11.0 | 9.0 | 9.0 | 8.5 | 10.5 | 9.4 | -8.6 | -9.0 | 3.8 | -9.6 | -9.6 | -8.4 | 32.3 | 38.5 | 46.0 |
| Malawi | 11.7 | 12.0 | 13.5 | 12.6 | 12.6 | 10.9 | 12.0 | 12.1 | -11.6 | -6.1 | -0.2 | -7.2 | -6.9 | -5.0 | 19.3 | 45.3 | 54.7 |
| Maldives | 23.4 | 24.0 | 31.6 | 21.2 | 21.2 | 8.8 | 20.2 | 18.1 | -5.5 | -3.8 | 36.4 | -7.1 | -7.1 | -3.6 | 52.7 | 78.3 | 146.0 |
| Marshall Islands | 54.2 | 64.2 | 58.6 | 72.9 | 72.1 | 17.8 | 18.4 | 17.0 | -5.3 | -5.5 | -2.5 | -1.7 | -1.7 | 0.5 | 39.4 | 25.0 | 18.9 |
| Mongolia | 16.1 | 19.7 | 26.8 | 26.0 | 26.0 | 19.6 | 22.5 | 21.5 | -44.0 | -10.8 | 4.3 | -10.5 | -10.5 | -9.2 | 31.0 | 68.4 | 77.0 |
| Morocco | 24.8 | 22.6 | 26.1 | 24.0 | 24.0 | 22.8 | 21.4 | 21.2 | 0.3 | 0.1 | 9.3 | -1.4 | -1.4 | -0.7 | 49.0 | 65.1 | 75.4 |
| Nepal | 12.9 | 21.2 | 19.4 | 22.0 | 22.0 | 11.7 | 19.8 | 15.7 | -17.7 | -9.4 | 0.5 | -10.3 | -10.3 | -9.9 | 35.3 | 33.1 | 42.2 |
| Niger |  | 20.3 | 21.8 | 21.9 | 21.9 |  | 11.0 | 9.6 |  | -3.2 | -1.8 | -8.4 | -8.0 | -5.9 | 15.1 | 39.8 | 45.0 |
| Palau | 51.0 | 43.3 | 59.1 | 46.6 | 44.9 | 17.1 | 18.8 | 18.2 |  | 4.6 | 7.2 | -3.6 | -3.4 | 10.6 |  | 38.6 | 62.1 |
| Papua New Guinea | 17.7 | 16.6 | 18.1 | 17.5 | 17.5 | 15.6 | 13.0 | 12.5 | -14.0 | 1.4 | 9.6 | -3.8 | -3.8 | -1.2 | 17.3 | 40.0 | 48.9 |
| Philippines | 10.6 | 13.0 | 17.5 | 18.5 | 18.5 | 11.6 | 14.5 | 14.0 | -4.5 | -1.5 | 13.2 | -4.0 | -4.0 | -3.3 | 47.6 | 37.0 | 51.7 |
| Rwanda | 14.0 | 16.1 | 17.4 | 17.0 | 16.7 | 11.6 | 14.6 | 14.8 | -8.0 | -9.2 | -1.9 | -10.0 | -9.6 | -7.0 | 18.8 | 50.2 | 60.1 |
| Saint Lucia | 15.7 | 17.4 | 24.3 | 18.0 | 18.0 | 18.2 | 19.7 | 21.3 | -1.2 | 2.6 | 29.3 | 0.1 | 0.1 | 2.1 | 52.8 | 61.4 | 93.5 |
| Samoa | 24.9 | 25.1 | 28.6 | 31.5 | 31.0 | 21.0 | 25.7 | 25.9 | 3.9 | -4.3 | 3.9 | -0.8 | -1.2 | 5.8 | 41.3 | 47.5 | 46.5 |
| Senegal | 11.7 | 18.2 | 19.1 | 12.8 | 12.7 | 15.0 | 18.5 | 17.4 | -2.4 | -2.8 | -0.5 | -6.0 | -5.7 | -3.0 | 28.5 | 63.8 | 68.7 |
| South Sudan |  | 29.9 | 36.0 | 23.1 | 23.1 |  | 4.0 | 4.3 |  | -8.7 | 4.8 | -33.4 | -28.8 | 21.3 |  | 31.3 | 35.8 |
| Sri Lanka | 11.4 | 10.9 | 13.4 | 13.4 | 13.4 | 11.3 | 11.6 | 8.1 | -6.8 | 2.5 | 7.7 | -1.3 | -1.3 | -1.0 | 71.6 | 86.8 | 101.2 |
| State of Palestine | 31.3 |  |  |  |  | 18.8 |  |  | -11.1 |  |  |  |  |  | 22.7 | 34.5 | 47.2 |
| Sudan | 13.2 | 18.4 | 11.5 | 14.9 | 14.9 | 5.9 | 5.4 | 3.1 | -24.8 | -50.0 | -160.8 | -52.8 | -52.8 | -3.4 | 74.6 | 200.3 | 272.9 |
| Timor-Leste |  | 58.6 | 73.9 | 71.6 | 70.5 |  | 7.6 | 7.6 |  | -6.4 | 7.4 | -4.2 | -4.3 | -2.4 | 0.0 | 11.5 | 13.9 |
| Tunisia | 19.1 |  | 27.9 | 24.4 | 24.1 | 20.1 |  | 23.8 | -3.1 |  | 8.0 | -4.0 | -4.0 | -3.1 | 45.5 | 74.2 | 89.7 |
| Tuvalu |  |  | 75.0 | 88.7 | 88.7 |  |  | 14.6 |  |  | -2.7 | -5.2 | -5.2 | -3.9 | 20.0 | 11.5 | 7.5 |
| United Republic of Tanzania | 12.6 |  | 14.3 | 15.5 | 15.4 | 10.0 |  | 11.8 | -12.2 |  | -1.9 | -6.9 | -7.2 | -5.6 | 27.6 | 39.0 | 39.1 |
| Vanuatu | 22.7 | 27.0 | 36.9 | 30.8 | 30.8 | 16.2 | 17.6 | 14.6 | -0.2 | -4.4 | 6.8 | -4.3 | -4.2 | -2.4 | 20.2 | 45.3 | 48.7 |
| Viet Nam | 14.2 |  | 13.9 | 13.6 | 13.6 | 17.6 |  | 12.4 | -15.5 |  | -1.2 | -7.0 | -7.0 | -5.9 | 36.8 | 43.6 | 46.3 |
| Yemen |  |  |  |  |  |  |  |  |  |  |  |  |  |  | 42.4 | 76.5 | 84.2 |

**Supplement D. Short-term and Medium-term Gaps**

| Country | Short-Term Gap (STG) | | | STG/(1-tyear) | | | Medium-Term Gap (MTG) | | | | | | MTG/(1-tyear) | |
| --- | --- | --- | --- | --- | --- | --- | --- | --- | --- | --- | --- | --- | --- | --- |
|  | 2010 | 2019 | 2020 | 2010 | 2019 | 2020 | 2011 | 2011-2020 (mean) | 2020 | 2020 (perfect foresight) | 2021 | 2021 Stressed | 2021 | 2021 stressed |
| Afghanistan | 5.7 | 10.7 | 10.7 | 0.06 | 0.12 | 0.12 |  | 12.25 | 11.8 | 10.3 | 8.6 | 8.7 | 0.093 | 0.095 |
| Bangladesh | -3.4 | -4.8 | -3.2 | -0.04 | -0.05 | -0.04 |  | . |  | -1.9 | -0.1 | 0.5 | -0.001 | 0.006 |
| Barbados | 8.2 | -6.9 | 25.7 | 0.11 | -0.10 | 0.36 |  | 2.92 | -3.7 | -1.3 | -7.2 | 0.6 | -0.101 | 0.008 |
| Bhutan | 0.2 | -3.8 | 8.6 | 0.00 | -0.05 | 0.10 |  | -9.51 |  |  |  |  |  |  |
| Burkina Faso | -3.8 | 0.7 | 1.2 | -0.04 | 0.01 | 0.01 |  | -4.65 |  | -0.6 | -3.9 | -3.5 | -0.046 | -0.042 |
| Cambodia | -1.9 | -6.8 | 2.2 | -0.02 | -0.09 | 0.03 |  | -3.82 | -6.0 | -1.0 | -3.8 | -3.1 | -0.046 | -0.038 |
| Colombia | 3.9 | 3.0 | 12.7 | 0.04 | 0.04 | 0.15 | 1.6 | 1.21 | 0.2 | 5.6 | 2.6 | 3.2 | 0.030 | 0.037 |
| Comoros | 6.0 | 10.3 | 12.5 | 0.06 | 0.11 | 0.14 |  | 13.22 | 10.1 | 10.2 | 9.7 | 9.8 | 0.106 | 0.106 |
| Costa Rica | 3.1 | 6.1 | 12.7 | 0.04 | 0.07 | 0.14 |  | 2.86 | 1.5 | 6.5 | 4.2 | 5.1 | 0.048 | 0.058 |
| DR of Congo | -25.4 | 1.6 | 2.6 | -0.28 | 0.02 | 0.03 |  | 4.64 | 3.3 | 5.4 | 4.7 | 5.7 | 0.050 | 0.061 |
| Dominican Rep | -4.0 | -1.5 | 10.7 | -0.05 | -0.02 | 0.12 |  | 0.80 | 0.8 | 2.8 | 0.0 | 0.4 | 0.000 | 0.005 |
| Ethiopia | -0.5 | -9.8 | -13.2 | -0.01 | -0.10 | -0.15 |  | -13.83 | -14.2 | -13.8 | -13.4 | -8.4 | -0.148 | -0.094 |
| Fiji | -1.6 | 3.3 | 24.8 | -0.02 | 0.04 | 0.30 |  | 3.06 | 4.9 | 13.5 | 10.8 | 14.9 | 0.129 | 0.176 |
| Gambia | -3.7 |  | 2.2 | -0.04 |  | 0.02 |  | -6.54 |  | -6.3 | -8.9 | -7.9 | -0.100 | -0.089 |
| Ghana | -0.8 | -3.0 | 9.3 | -0.01 | -0.03 | 0.11 |  | -4.06 | -3.7 | -0.4 | -5.6 | -3.3 | -0.064 | -0.038 |
| Grenada | 0.9 | -4.2 | 12.6 | 0.01 | -0.05 | 0.16 |  | -6.87 | -7.1 | -3.3 | -6.9 | -5.4 | -0.088 | -0.069 |
| Guatemala | 0.6 | 0.7 | 4.7 | 0.01 | 0.01 | 0.05 |  | 0.57 | 0.3 | 1.6 | 0.9 | 1.2 | 0.010 | 0.013 |
| Haiti | 9.4 | 0.2 | -0.8 | 0.10 | 0.00 | -0.01 |  | 2.93 | 2.9 | 6.0 |  |  |  |  |
| Honduras | 3.7 | -1.8 | 8.6 | 0.04 | -0.02 | 0.10 |  | -2.58 | -2.9 | 2.4 | -1.0 | -0.5 | -0.012 | -0.006 |
| Kenya | -1.3 | 1.5 | 6.3 | -0.02 | 0.02 | 0.07 |  | -7.95 |  | -3.6 | -5.5 | -5.2 | -0.064 | -0.059 |
| Kiribati |  | 62.2 | 50.2 |  | 0.80 | 0.65 |  | 44.06 |  |  |  |  |  |  |
| Lebanon | -2.5 | 17.7 | -48.9 | -0.03 | 0.21 | -0.55 |  | 8.98 | 11.4 | 3.8 |  |  |  |  |
| Madagascar | -3.7 | -4.7 | 3.0 | -0.04 | -0.05 | 0.03 |  | -6.02 | -6.9 | -3.0 | -5.9 | -5.3 | -0.066 | -0.059 |
| Malawi | -2.0 | -2.6 | 1.3 | -0.02 | -0.03 | 0.02 |  | -0.42 |  | -2.3 | -3.4 | -2.0 | -0.038 | -0.022 |
| Maldives | 11.9 | 1.0 | 41.9 | 0.13 | 0.01 | 0.51 |  | 2.91 |  | 6.1 | -6.6 | -0.8 | -0.080 | -0.009 |
| Marshall Islands | 34.2 | 44.5 | 41.0 | 0.42 | 0.54 | 0.49 |  | 45.03 |  | 54.0 | 58.3 | 58.8 | 0.702 | 0.686 |
| Mongolia | -24.8 | -10.9 | 8.2 | -0.31 | -0.14 | 0.10 |  | -6.93 | -9.2 | -1.1 |  |  |  |  |
| Morocco | 2.2 | 1.3 | 11.0 | 0.03 | 0.02 | 0.14 |  | -0.80 | -2.6 | 4.0 | 2.1 | 2.6 | 0.026 | 0.033 |
| Nepal | -5.8 | -1.5 | 3.9 | -0.07 | -0.02 | 0.05 |  | -3.03 |  | 3.0 | -4.7 | -4.5 | -0.056 | -0.057 |
| Niger |  | 8.1 | 11.5 |  | 0.09 | 0.13 |  | 8.81 | 7.3 | 9.4 | 7.6 | 8.9 | 0.084 | 0.099 |
| Palau |  | 26.1 | 43.7 |  | 0.32 | 0.53 |  | 16.83 |  | 31.9 | 29.2 | 39.3 | 0.357 | 0.461 |
| Papua NG | -1.0 | 4.1 | 9.5 | -0.01 | 0.05 | 0.11 | -0.9 | -1.37 | 0.8 | 4.8 | 2.9 | 4.3 | 0.033 | 0.049 |
| Philippines | -3.3 | -2.1 | 8.4 | -0.04 | -0.02 | 0.10 |  | . |  |  |  |  |  |  |
| Rwanda | 0.9 | -2.6 | 1.6 | 0.01 | -0.03 | 0.02 |  | -2.16 |  | -2.2 | -5.6 | -3.4 | -0.066 | -0.040 |
| Saint Lucia | -3.1 | -0.7 | 21.0 | -0.04 | -0.01 | 0.27 | -5.5 | -2.08 | -2.4 | 1.5 | -1.6 | 0.2 | -0.020 | 0.003 |
| Samoa | 5.2 | -2.8 | 4.6 | 0.07 | -0.04 | 0.06 |  | -1.32 | -3.2 | 5.8 | 9.1 | 12.2 | 0.122 | 0.156 |
| Senegal | -4.0 | -2.1 | 1.4 | -0.05 | -0.03 | 0.02 | -5.9 | -8.03 |  | -6.9 | -9.3 | -7.0 | -0.112 | -0.084 |
| South Sudan |  | 21.9 | 33.1 |  | 0.23 | 0.35 |  | . |  | 5.7 | -1.1 | 25.1 | -0.011 | 0.264 |
| Sri Lanka | -5.1 | 1.4 | 11.9 | -0.06 | 0.02 | 0.13 |  | -1.71 |  | 5.7 |  |  |  |  |
| State of Palestine | 9.9 |  |  | 0.12 |  |  |  | . |  |  |  |  |  |  |
| Sudan | -10.3 | -80.5 | -313.6 | -0.11 | -0.85 | -3.24 |  | -152.31 | -686.6 | -825.9 | -298.9 | -3.6 | -3.084 | -0.039 |
| Timor-Leste |  | 50.4 | 67.2 |  | 0.55 | 0.73 |  | 40.10 | 37.4 | 65.1 | 63.6 | 63.9 | 0.688 | 0.689 |
| Tunisia | -2.4 |  | 10.0 | -0.03 |  | 0.13 | 1.5 | -1.18 |  | 0.3 | -3.7 | -2.8 | -0.048 | -0.037 |
| Tuvalu |  |  | 60.1 |  |  | 0.70 |  | 97.84 |  | 71.1 | 72.1 | 72.2 | 0.845 | 0.862 |
| UR of Tanzania | -0.3 |  | 1.8 | 0.00 |  | 0.02 |  | . |  | 1.1 | 1.5 | 2.1 | 0.017 | 0.023 |
| Vanuatu | 6.5 | 7.3 | 25.3 | 0.08 | 0.09 | 0.30 |  | 5.31 | 5.4 |  |  |  |  |  |
| Viet Nam | -9.0 |  | 1.0 | -0.11 |  | 0.01 |  | . |  |  |  |  |  |  |
| Yemen |  |  |  |  |  |  |  | . |  |  |  |  |  |  |

**Supplement E. Indices of Fiscal Policy Sustainability, 2010 to 2021[[1]](#footnote-1)**

| 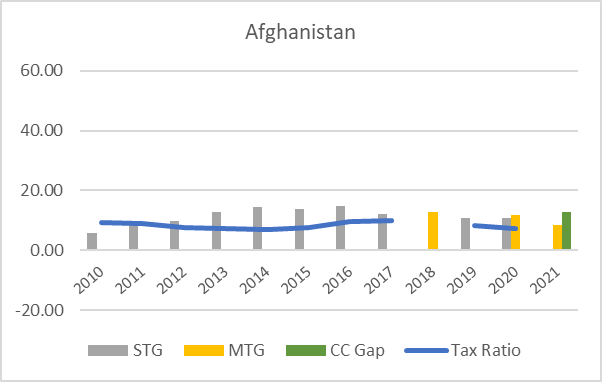 | 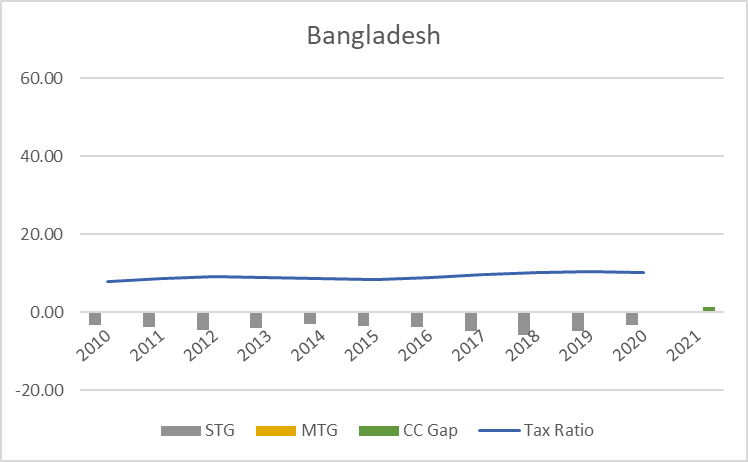 |
| --- | --- |
| 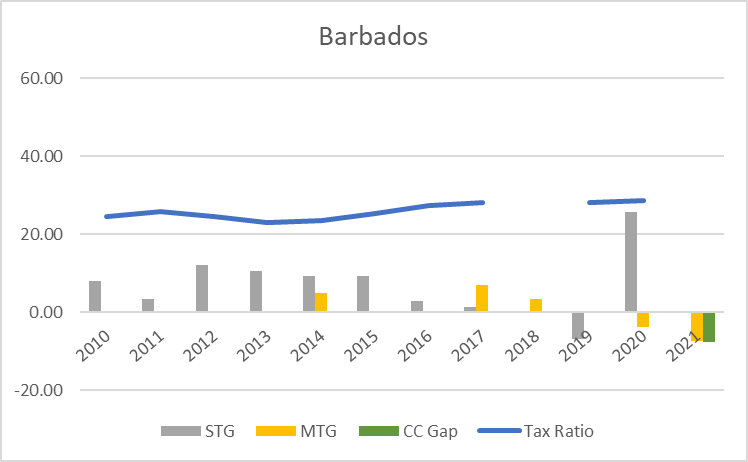 | 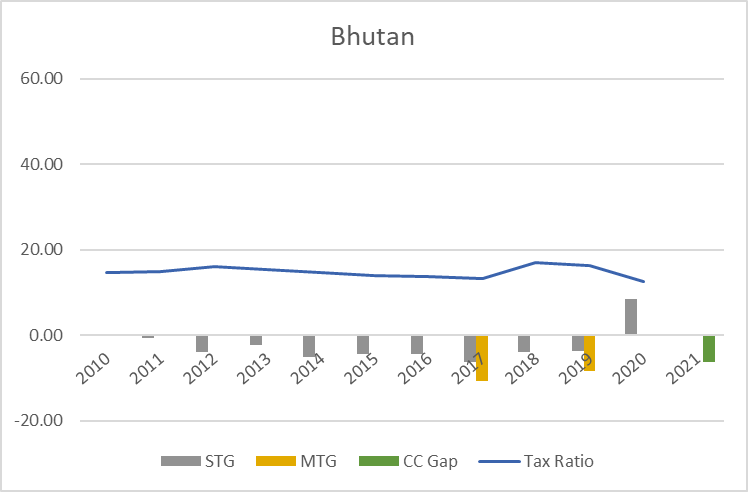 |
| 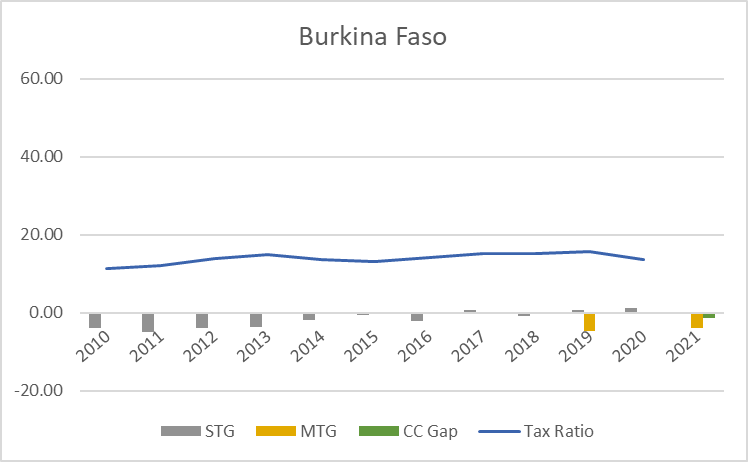 | 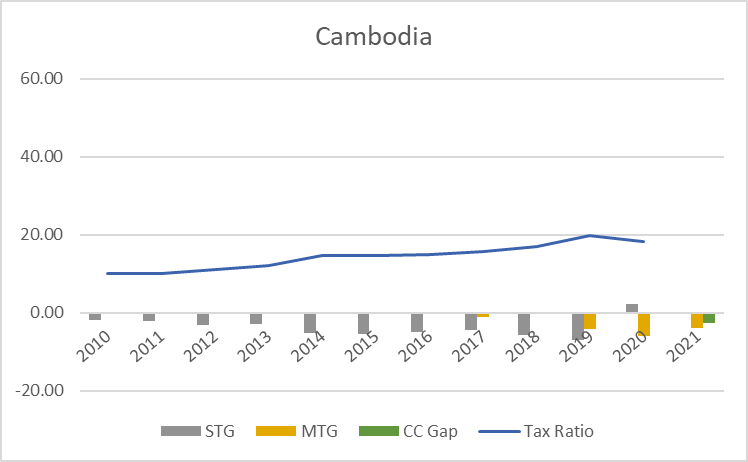 |
| 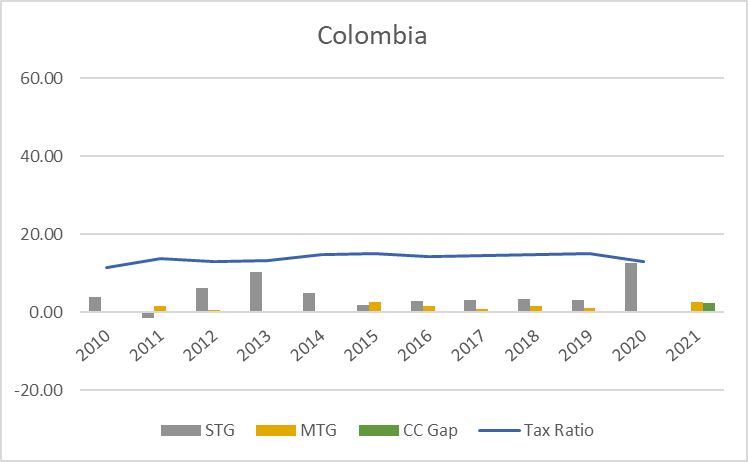 | 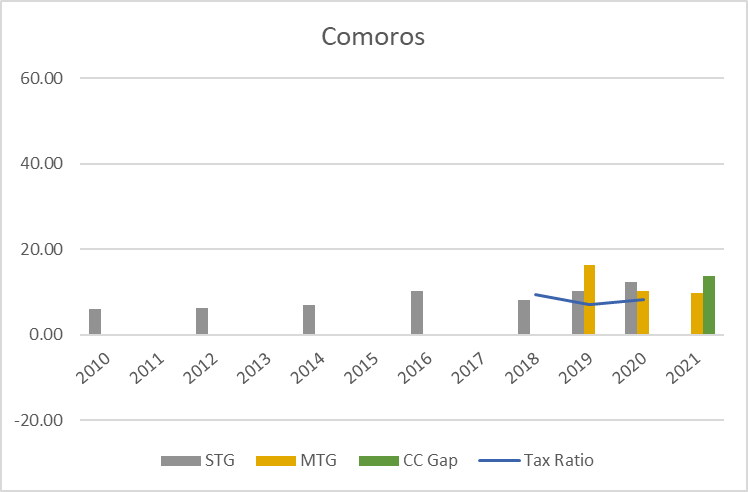 |
| 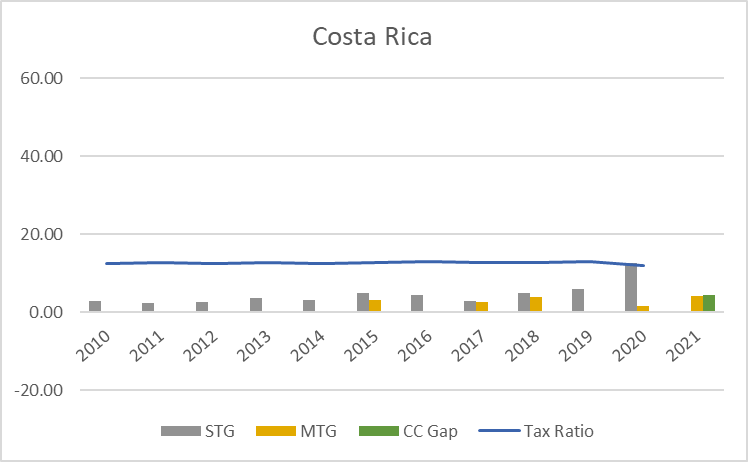 | 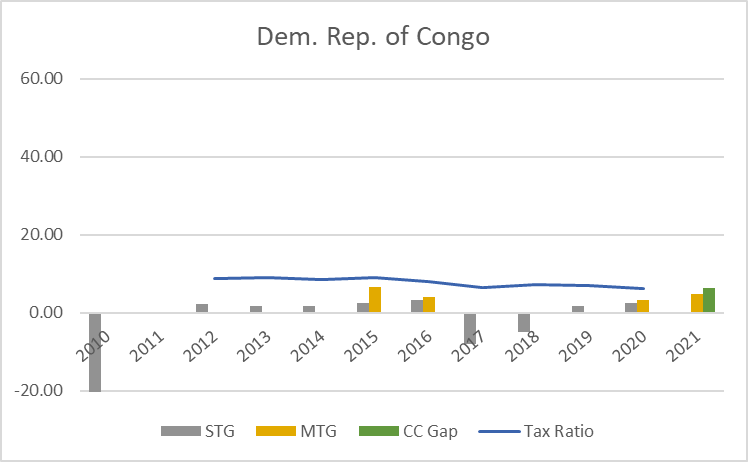 |
| 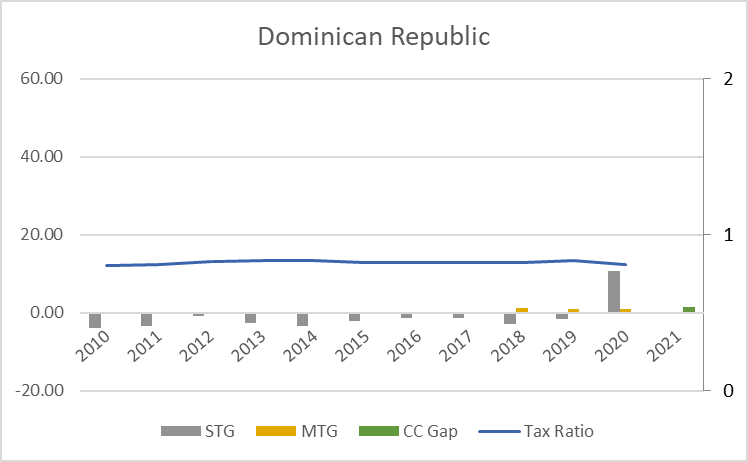 | 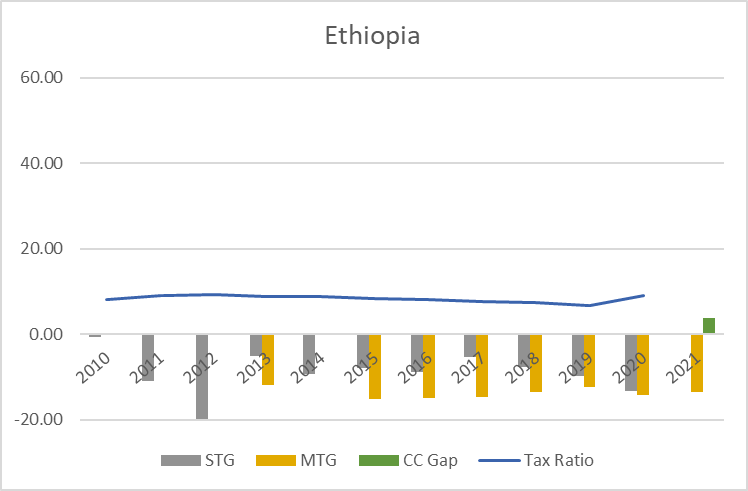 |
| 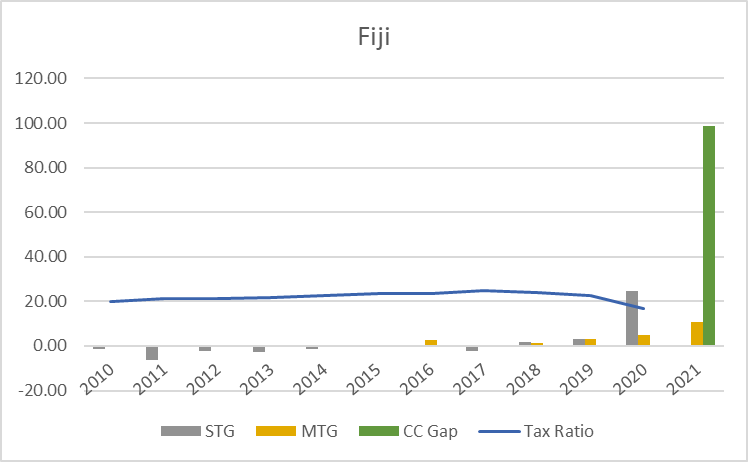 | 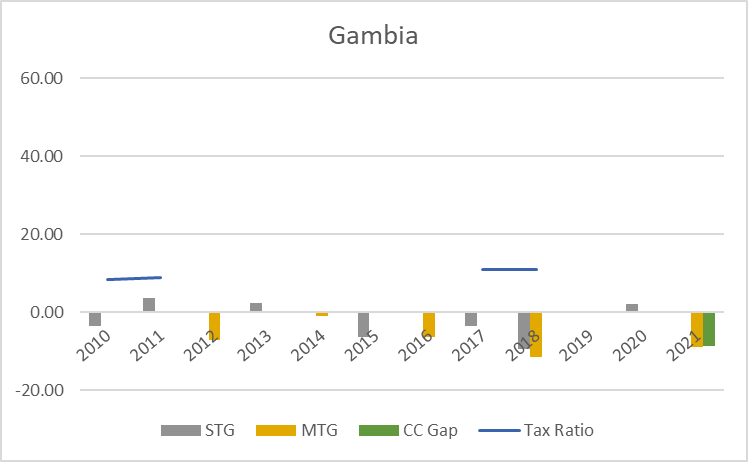 |
| 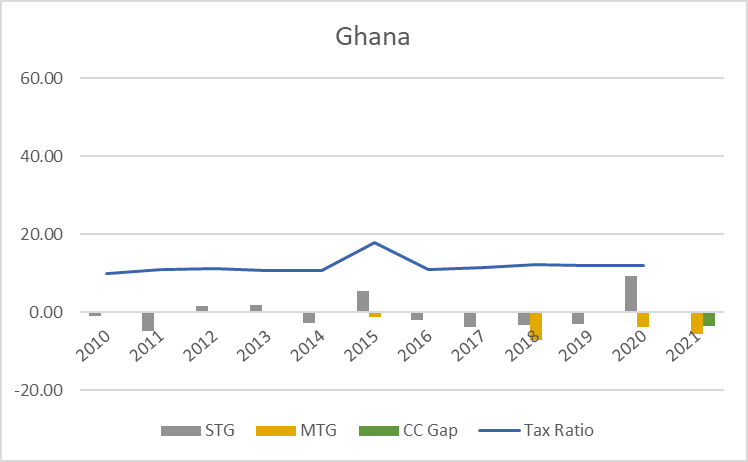 | 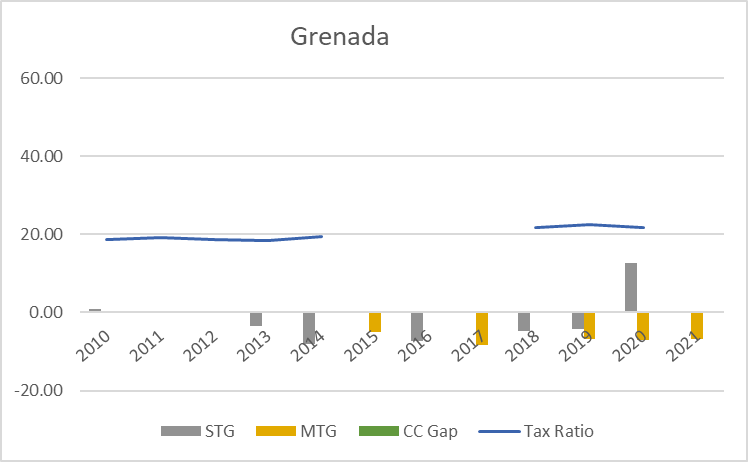 |
| 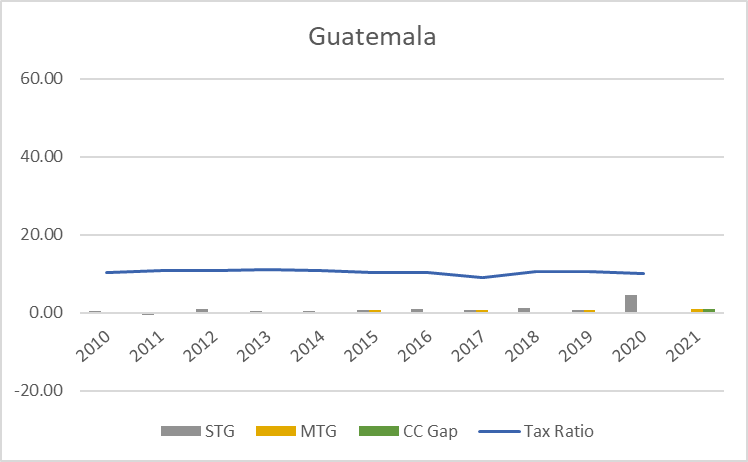 | 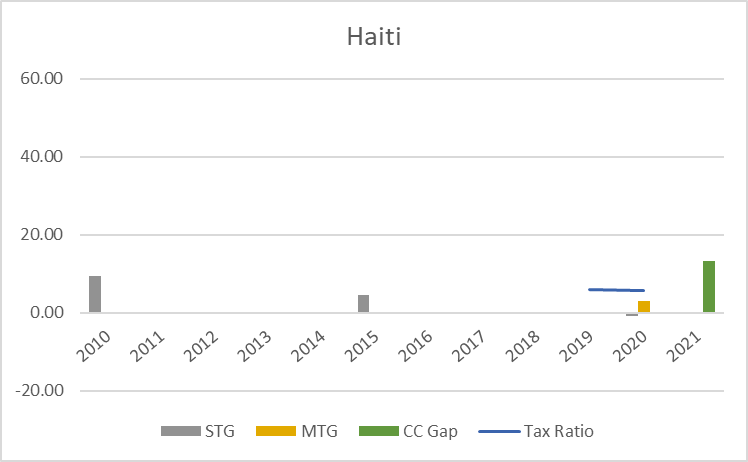 |
| 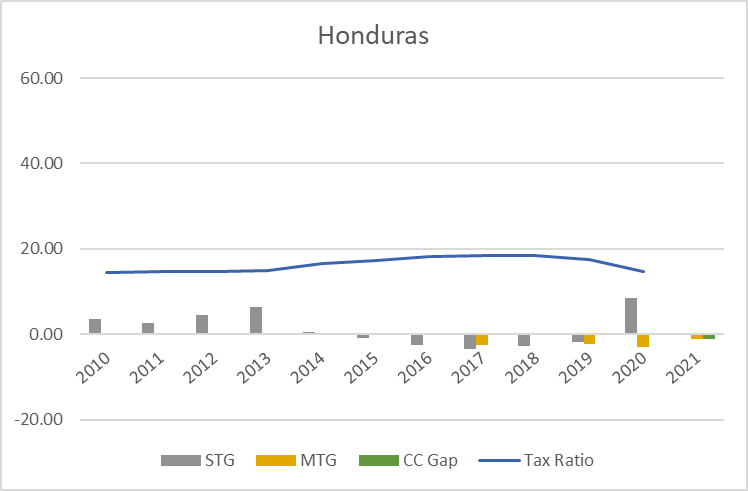 | 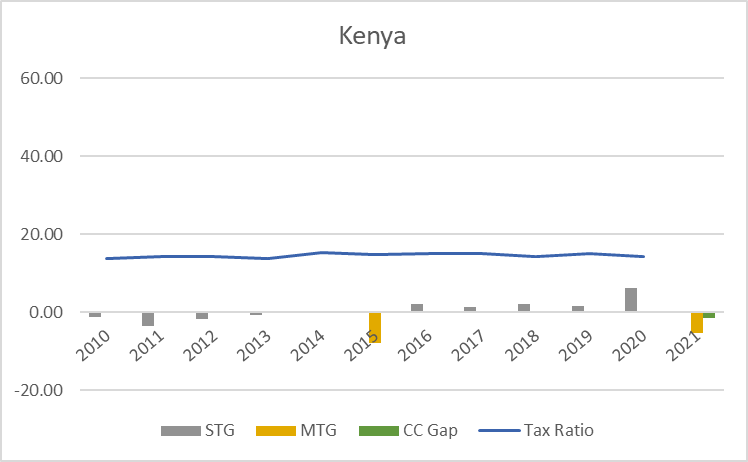 |
| 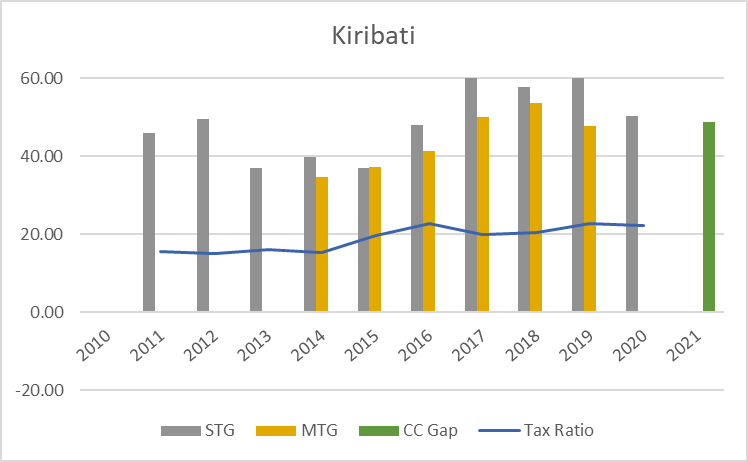 | 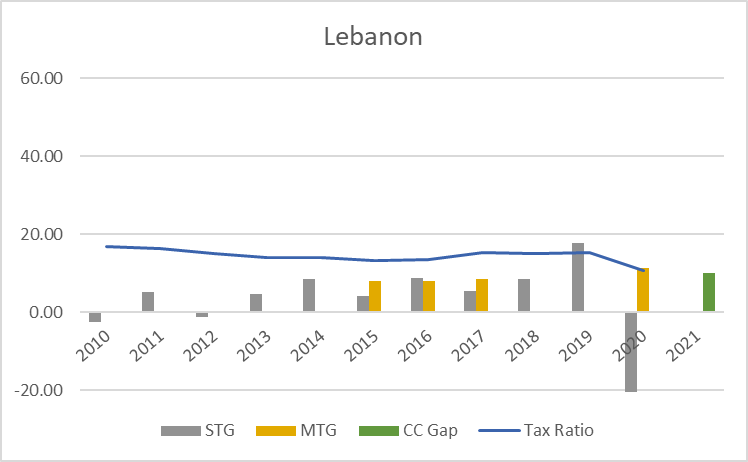 |
| 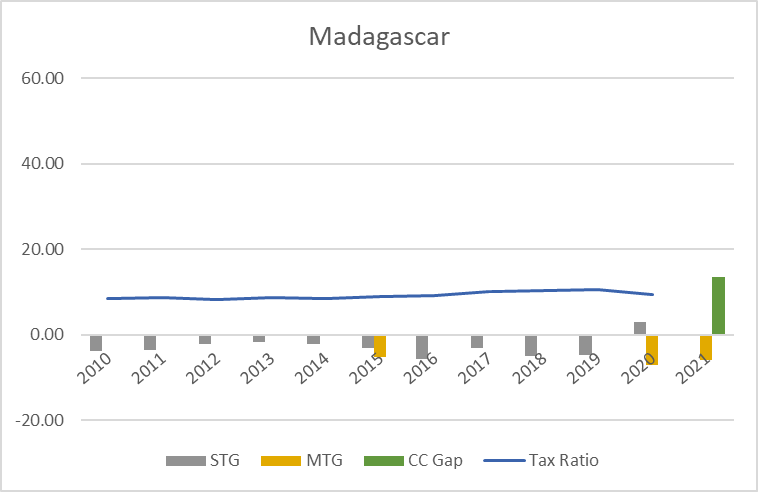 | 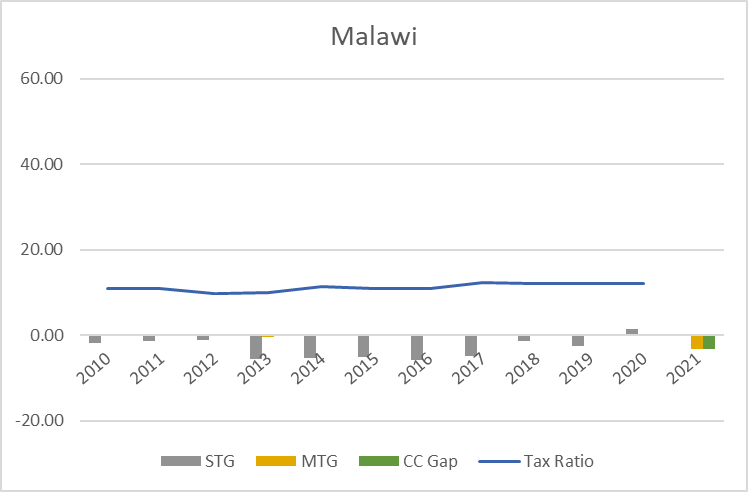 |
| 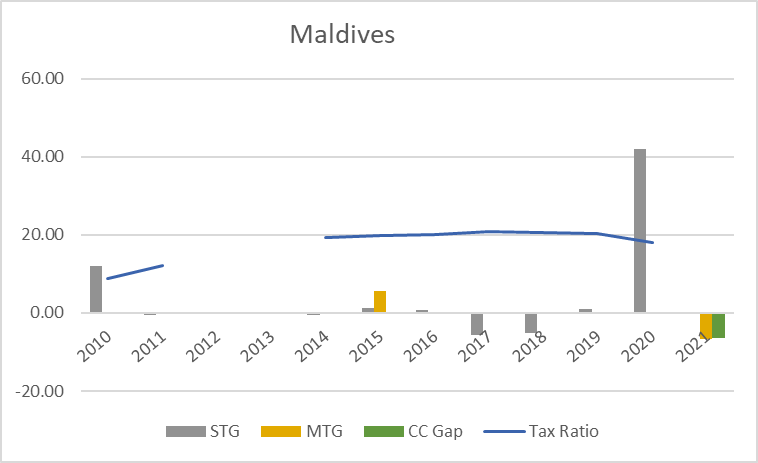 | 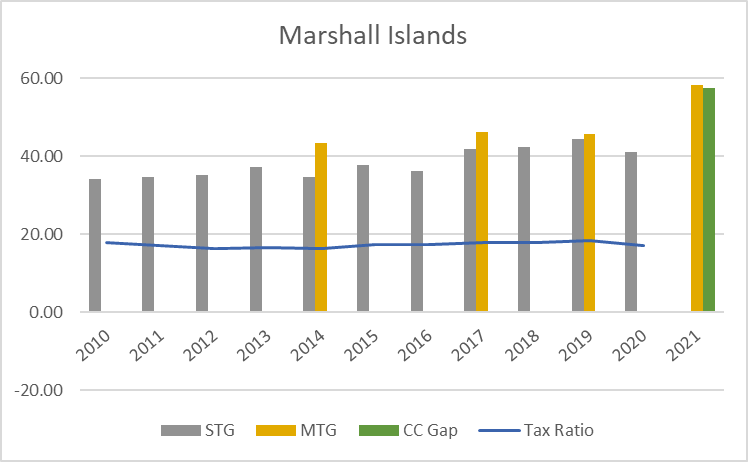 |
| 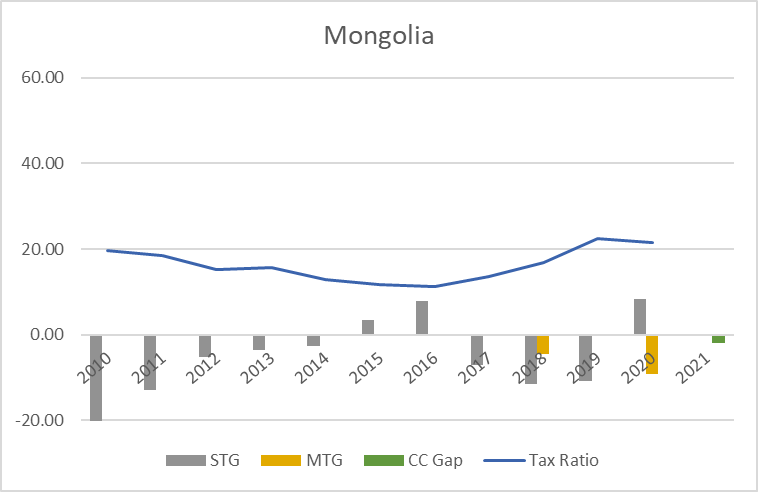 | 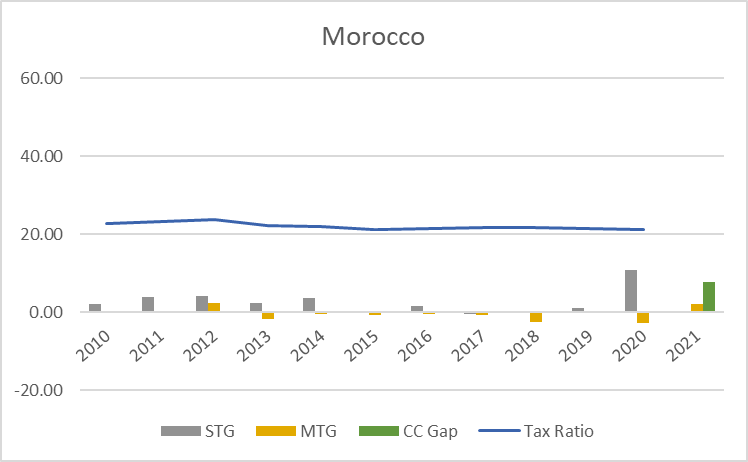 |
| 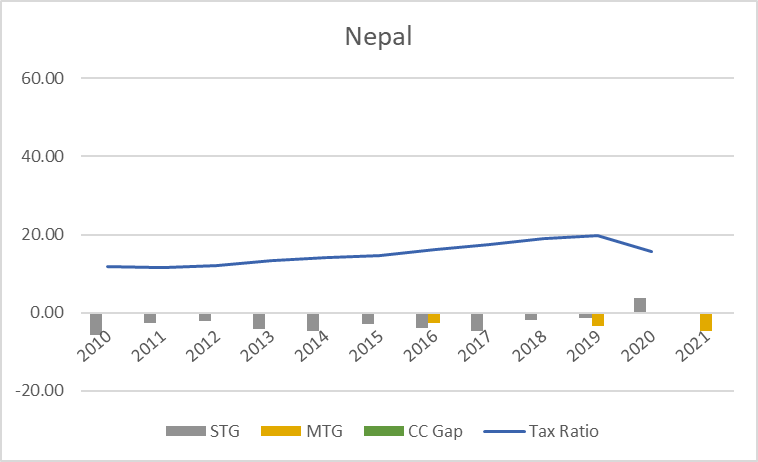 | 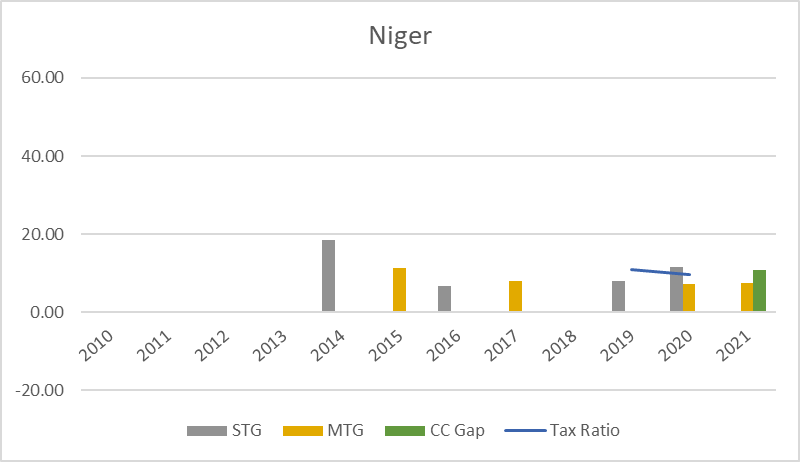 |
| 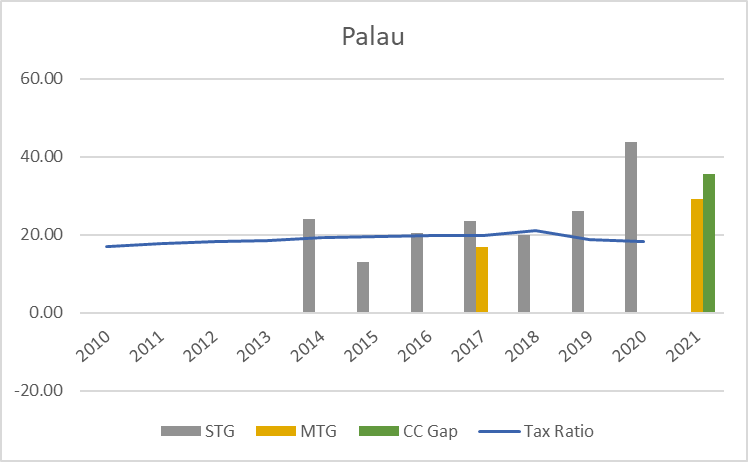 | 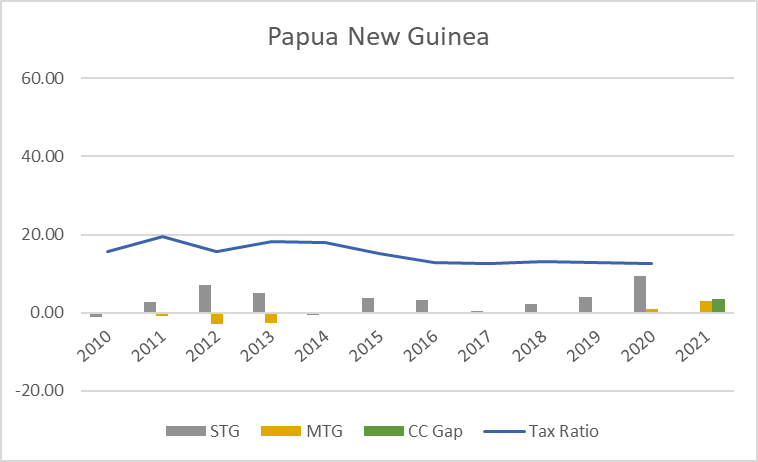 |
| 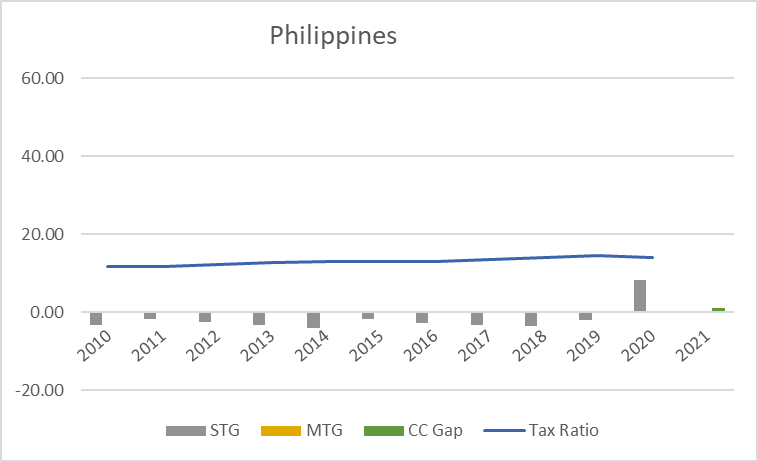 | 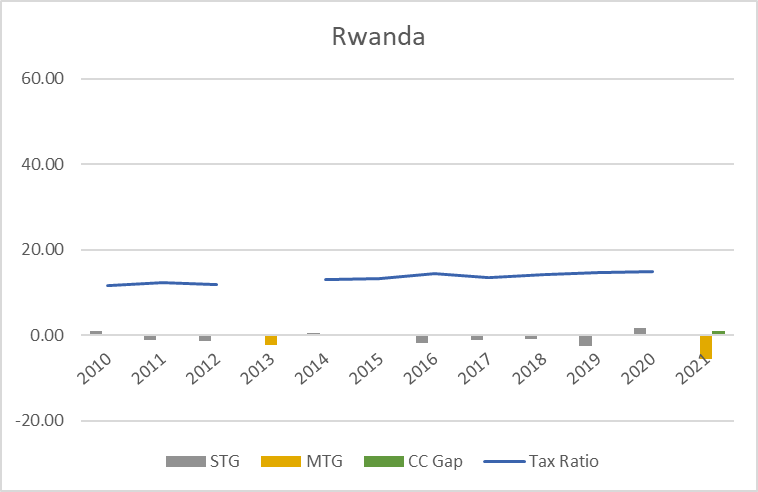 |
| 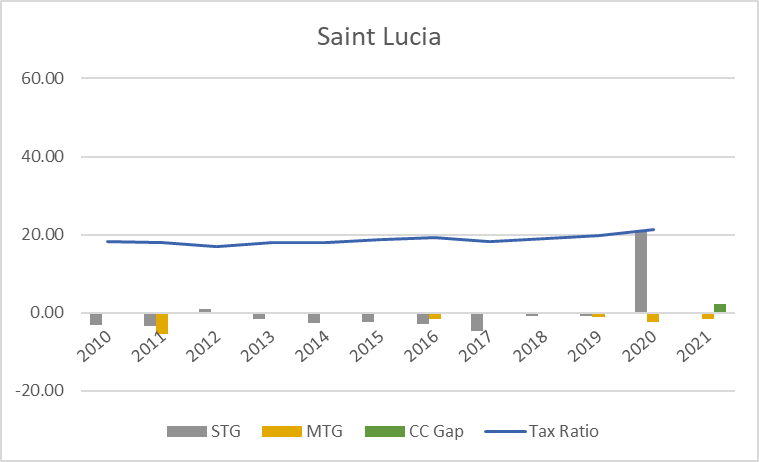 | 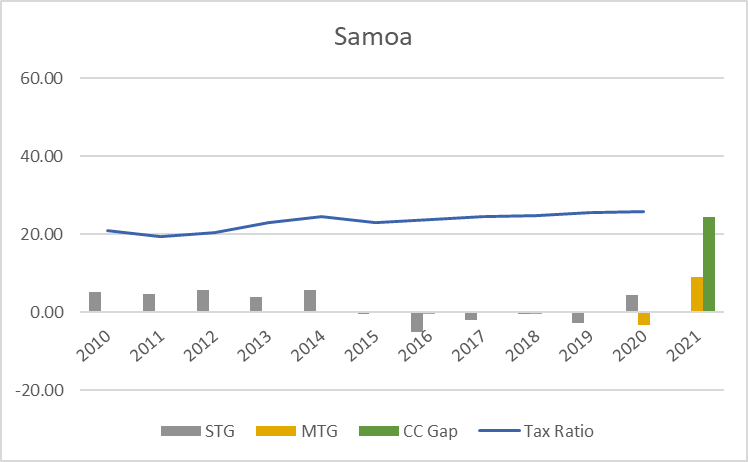 |
| 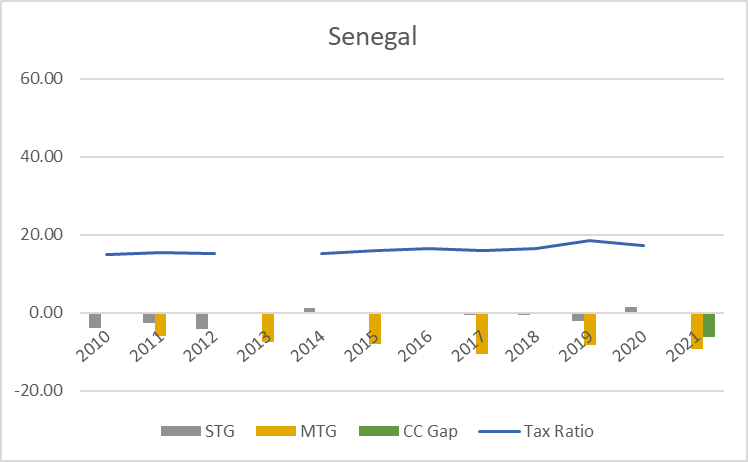 | 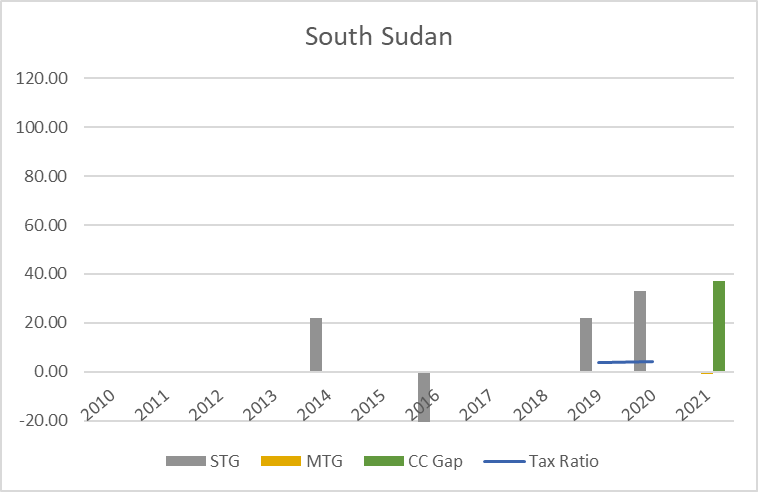 |
| 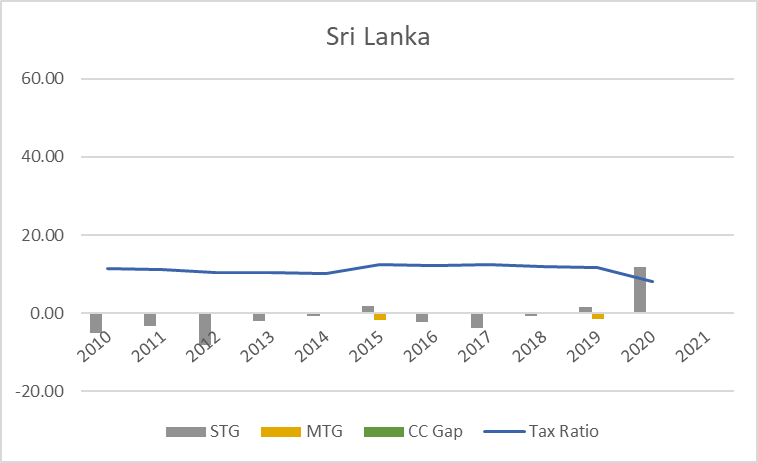 | 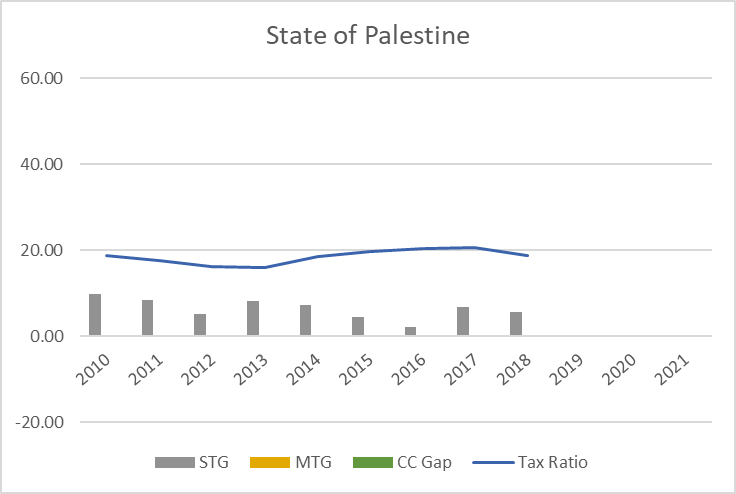 |
| 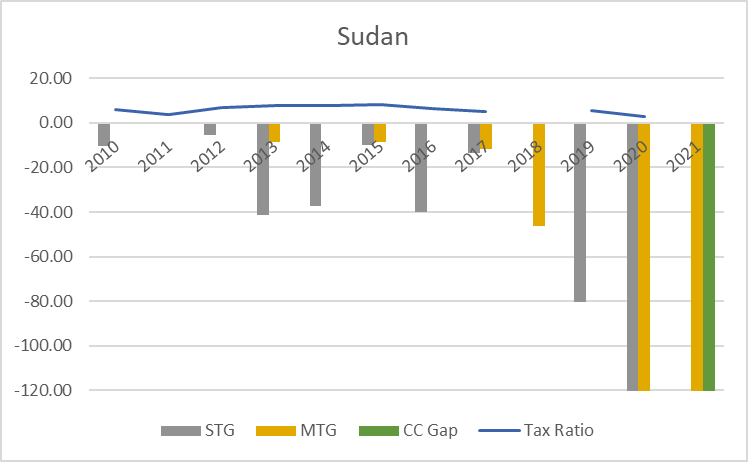 | 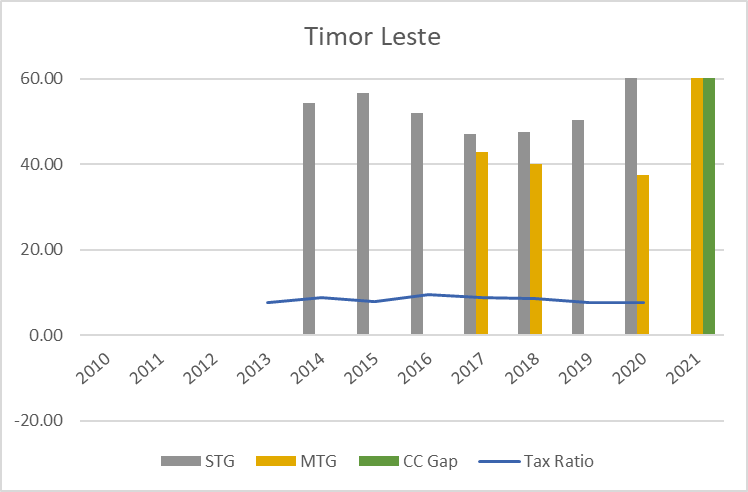 |
| 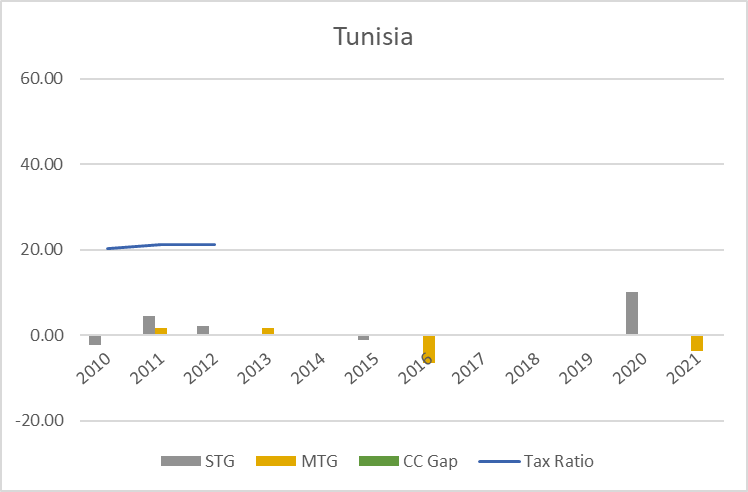 | 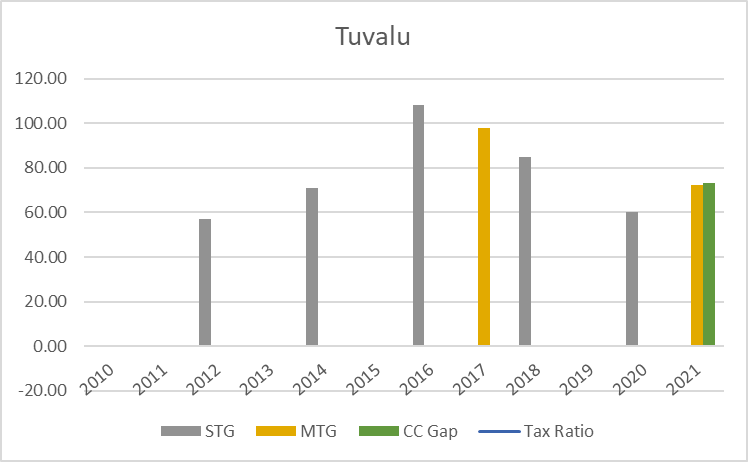 |
| 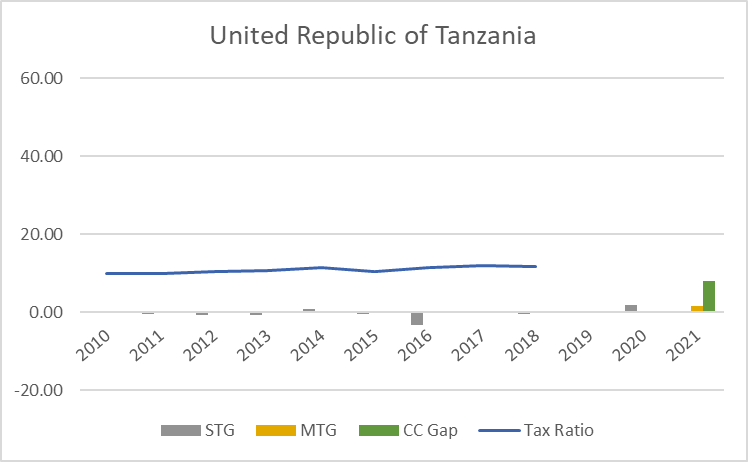 | 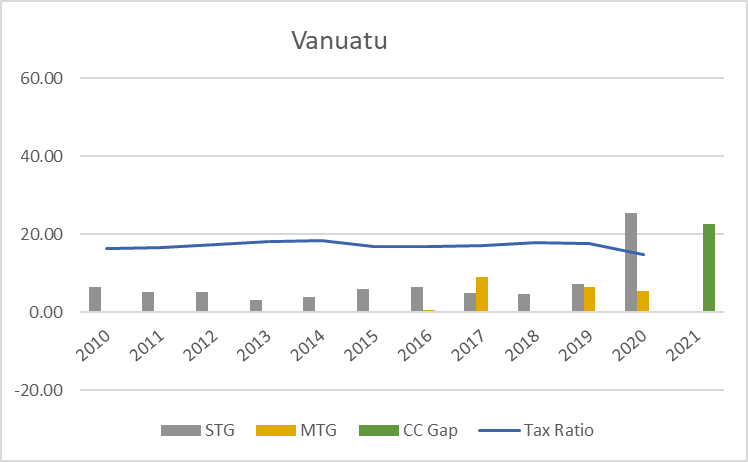 |
| 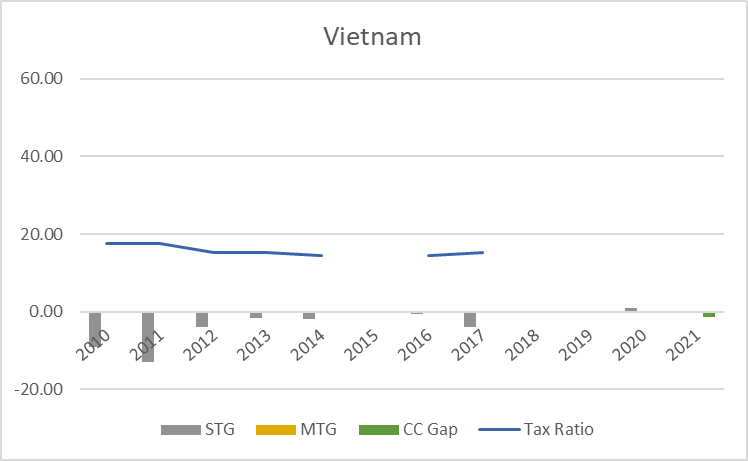 | 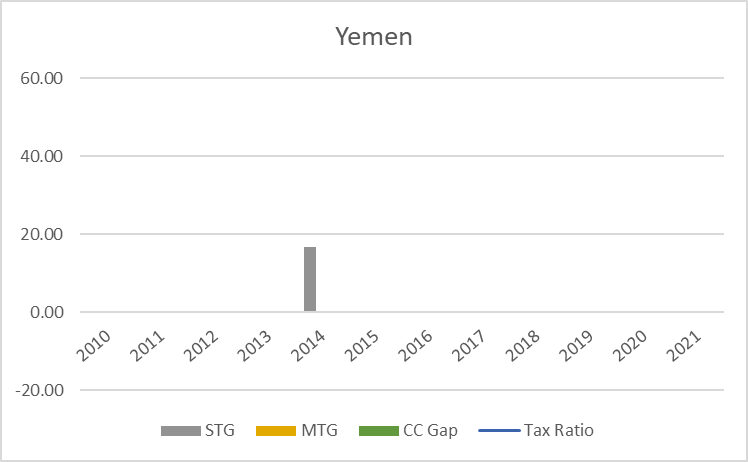 |

1. Refer to Annex 1 for definitions. [↑](#footnote-ref-1)
